# Supplementary material for: Suhuai suckling piglet hindgut microbiome-metabolome responses to different dietary copper levels
Source: PubMed Central journal article supplement (PMC6373200; doi:10.1007/s00253-018-9533-0), 2018-12-07
Supplement: 253_2018_9533_MOESM1_ESM.pdf [file 253_2018_9533_MOESM1_ESM.pdf]

# Suhuai suckling piglet hindgut microbiome-metabolome responses to different dietary copper levels

Feng Zhang<sup>1,2</sup>, Weijiang Zheng<sup>1</sup>, Yongqiang Xue<sup>1</sup>, Wen Yao<sup>1,3\*</sup>

<sup>1</sup>Jiangsu Key Laboratory of Gastrointestinal Nutrition and Animal Health, College of Animal Science and Technology, Nanjing Agricultural University, Nanjing, China

<sup>2</sup>College of Agriculture, Guangdong Ocean University, Zhanjiang, China

<sup>3</sup>Key lab of Animal Physiology and Biochemistry, Ministry of Agriculture, Nanjing, China

\*Correspondence: Prof. Wen Yao, Email: yaowen67jp@njau.edu.cn

## Supplementary Figures

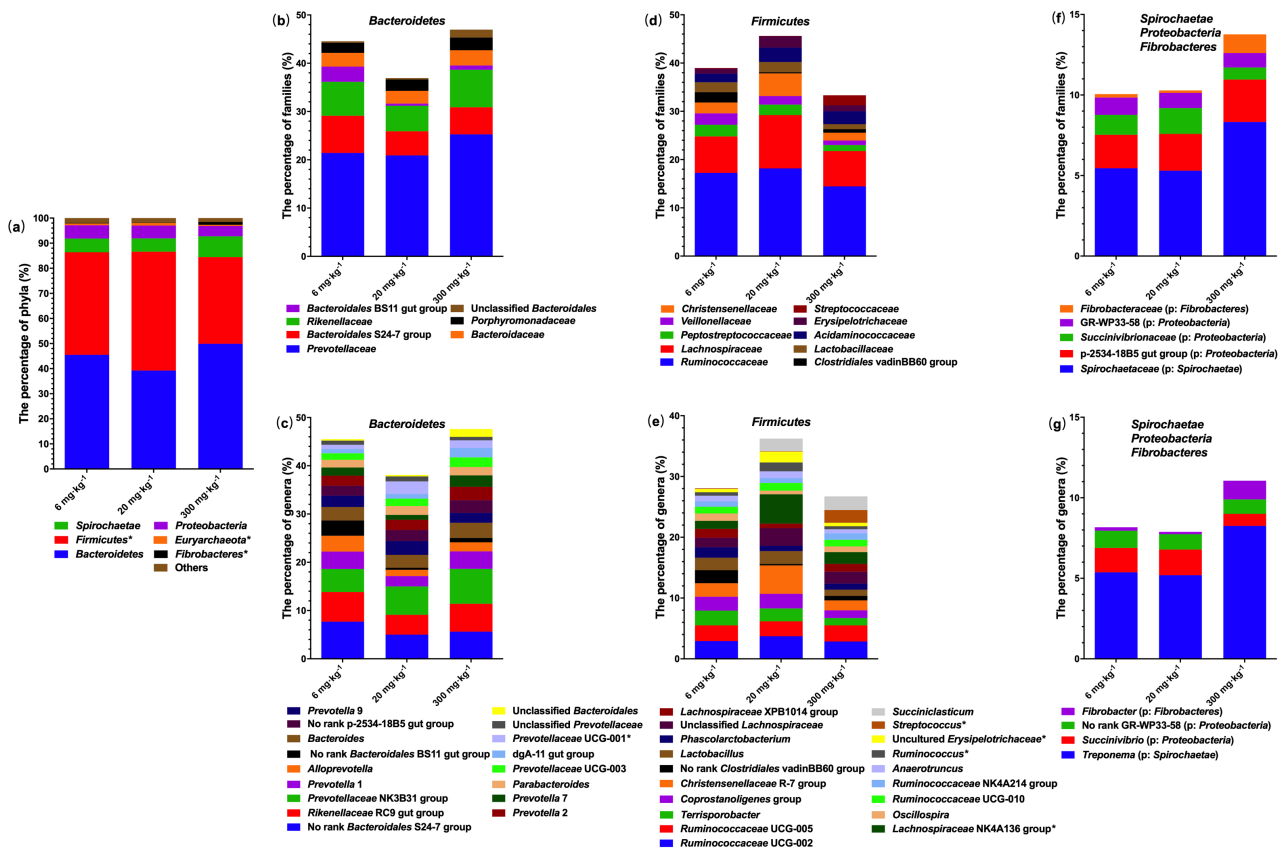

**Fig. S1** The composition of fecal microbiota in suckling piglets at phylum, family, and genus level (relative abundance of more than 1%). The *Bacteroidetes*, *Firmicutes*, *Spirochaetae*, and *Proteobacteria* phyla constituted approximately 96% of the identified sequences (a), broken down as follows: seven families (b) and 17 genera (c) in *Bacteroidetes*; ten families (d) and 19 genera (e) in *Firmicutes*; five families (f) and four genera (g) in *Spirochaetae*, *Proteobacteria* and *Fibrobacteres*

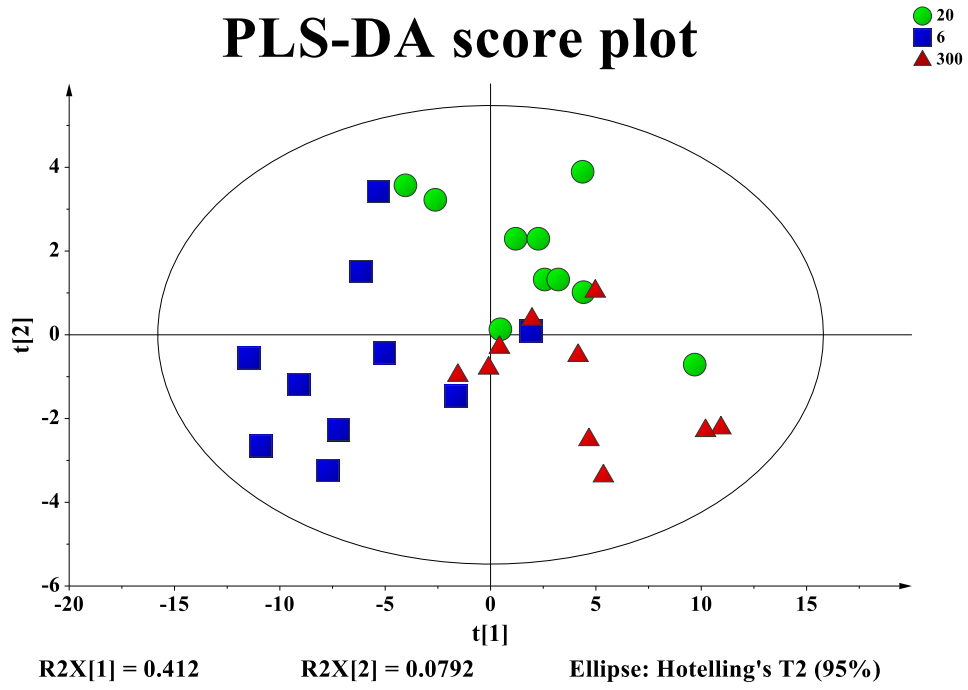

**Fig. S2** Partial least squares-discriminant analysis (PLS-DA) of fecal metabolites in suckling piglets among each dietary copper group

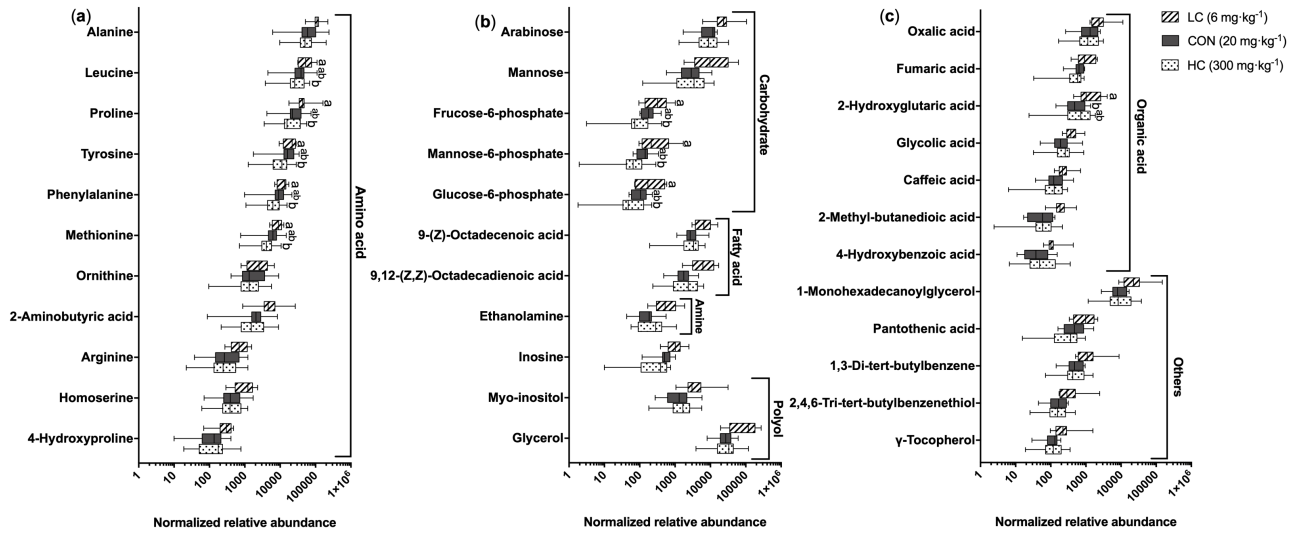

**Fig. S3** Effect of dietary copper level on normalized relative abundance of fecal metabolites in suckling piglets

## Supplementary Tables

**Table S1.** Significant compounds in fecal samples among each group of suckling piglets

| Category               | Metabolite                      | VIP <sup>1</sup> | P-value |
|------------------------|---------------------------------|------------------|---------|
| Carbohydrate           | Arabinose                       | 1.41             | <0.01   |
|                        | Glucose                         | 1.18             | <0.01   |
|                        | Mannose-6-phosphate             | 1.17             | <0.01   |
|                        | Mannose                         | 1.16             | <0.01   |
|                        | Fructose-6-phosphate            | 1.15             | <0.01   |
|                        | Glucose-6-phosphate             | 1.14             | <0.01   |
| Amino acid             | Lysine                          | 1.51             | <0.01   |
|                        | Methionine                      | 1.40             | <0.01   |
|                        | Alanine                         | 1.39             | <0.01   |
|                        | Proline                         | 1.34             | <0.01   |
|                        | Phenylalanine                   | 1.30             | <0.01   |
|                        | Arginine                        | 1.29             | <0.01   |
|                        | Valine                          | 1.28             | <0.01   |
|                        | 4-Hydroxyproline                | 1.24             | <0.01   |
|                        | Leucine                         | 1.22             | <0.01   |
|                        | Ornithine                       | 1.21             | <0.01   |
|                        | Homoserine                      | 1.19             | <0.01   |
|                        | 2-Aminobutyric acid             | 1.19             | <0.01   |
|                        | Isoleucine                      | 1.18             | <0.01   |
|                        | Serine                          | 1.14             | <0.01   |
|                        | Tyrosine                        | 1.08             | <0.01   |
|                        | Aspartic acid                   | 1.07             | <0.05   |
| Threonine              | 1.02                            | <0.05            |         |
| Fatty acid             | 9,12-(Z,Z)-Octadecadienoic acid | 1.31             | <0.01   |
|                        | 9-(Z)-Octadecenoic acid         | 1.19             | <0.01   |
| Amine                  | Putrescine                      | 1.36             | <0.01   |
|                        | Ethanolamine                    | 1.16             | <0.01   |
| Polyol                 | Glycerol                        | 1.29             | <0.01   |
|                        | Myo-inositol                    | 1.14             | <0.01   |
| Organic acid           | 2-Methyl-butanedioic acid       | 1.62             | <0.01   |
|                        | Caffeic acid                    | 1.25             | <0.01   |
|                        | Glycolic acid                   | 1.25             | <0.01   |
|                        | Malic acid                      | 1.21             | <0.05   |
|                        | Fumaric acid                    | 1.21             | <0.05   |
|                        | 4-Hydroxybenzoic acid           | 1.11             | <0.05   |
|                        | Benzoic acid                    | 1.10             | <0.05   |
|                        | Adipic acid                     | 1.06             | <0.05   |
| 2-Hydroxyglutaric acid | 1.06                            | <0.05            |         |

|            |                          |      |       |
|------------|--------------------------|------|-------|
|            | Oxalic acid              | 1.03 | <0.05 |
|            | Lactic acid              | 1.00 | <0.05 |
| Nucleotide | Inosine                  | 1.28 | <0.01 |
|            | Pseudouridine            | 1.14 | <0.01 |
| Others     | Pantothenic acid         | 1.38 | <0.01 |
|            | 1,3-Di-tert-butylbenzene | 1.38 | <0.01 |
|            | Uracil                   | 1.33 | <0.01 |
|            | $\gamma$ -Tocopherol     | 1.26 | <0.01 |
|            | 3-Hydroxypyridine        | 1.02 | <0.05 |

---

<sup>1</sup>Variable important projection (VIP) value was obtained from partial least squares discriminant analysis (PLS-DA) model with a threshold of 1.0
